# Supplementary material
Source: PubMed Central journal article supplement (PMC2911228)
Supplement: NIHMS219964-supplement-supplemental_Data_1.pdf [file NIHMS219964-supplement-supplemental_Data_1.pdf]

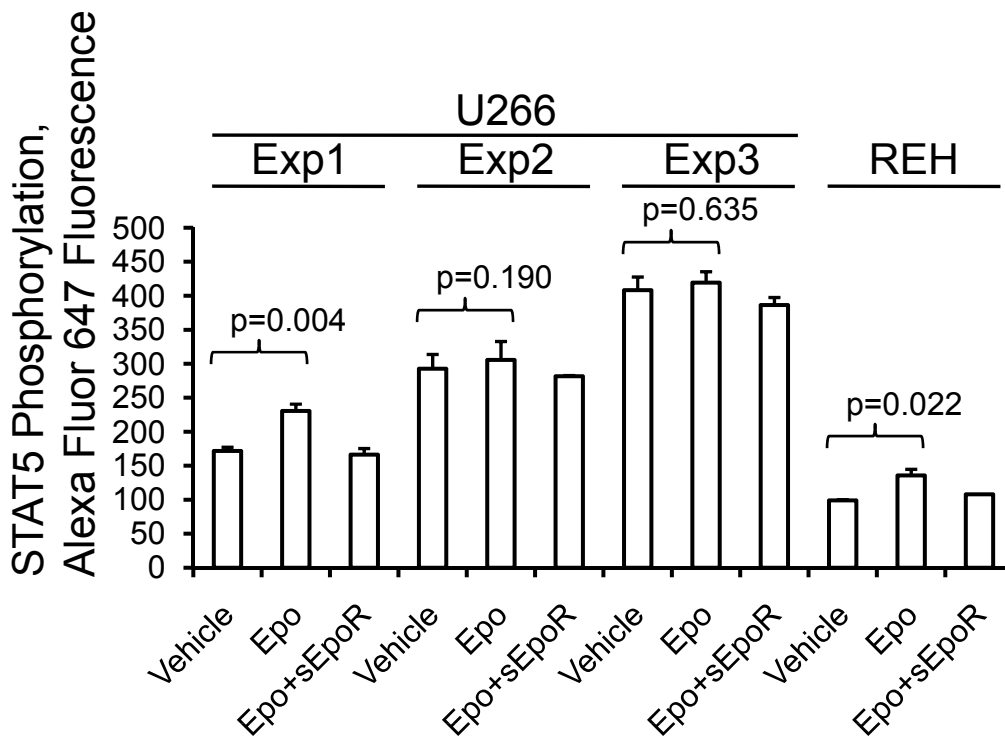

**Supplemental Fig. 1. Epo induced STAT5 Phosphorylation in non-erythroid cell lines.** STAT5 phosphorylation was measured by intracellular flow cytometry using an Alexa Fluor 647-anti-phospho-STAT5 (PY694) antibody. Cells were washed free of serum, starved for 5 hours in RPMI + 0.5% BSA, then stimulated for 15 minutes with vehicle (Procrit buffer) or Epo (Procrit, 10U/mL). Soluble recombinant human EpoR (sEpoR, 2.25µg/mL) was used as an Epo antagonist. Error bars represent the standard deviation of triplicate staining reactions, which were performed for all treatment groups except Epo+sEpoR in REH leukemia cells. P values were determined using the t-test. Epo-induced STAT5 phosphorylation reached significance in 1 out of 3 experiments with U266 myeloma cells. A similar effect was observed in REH cells.
