# Supplementary material
Source: PubMed Central journal article supplement (PMC2911228)
Supplement: NIHMS219964-supplement-supplemental_Data_2.pdf [file NIHMS219964-supplement-supplemental_Data_2.pdf]

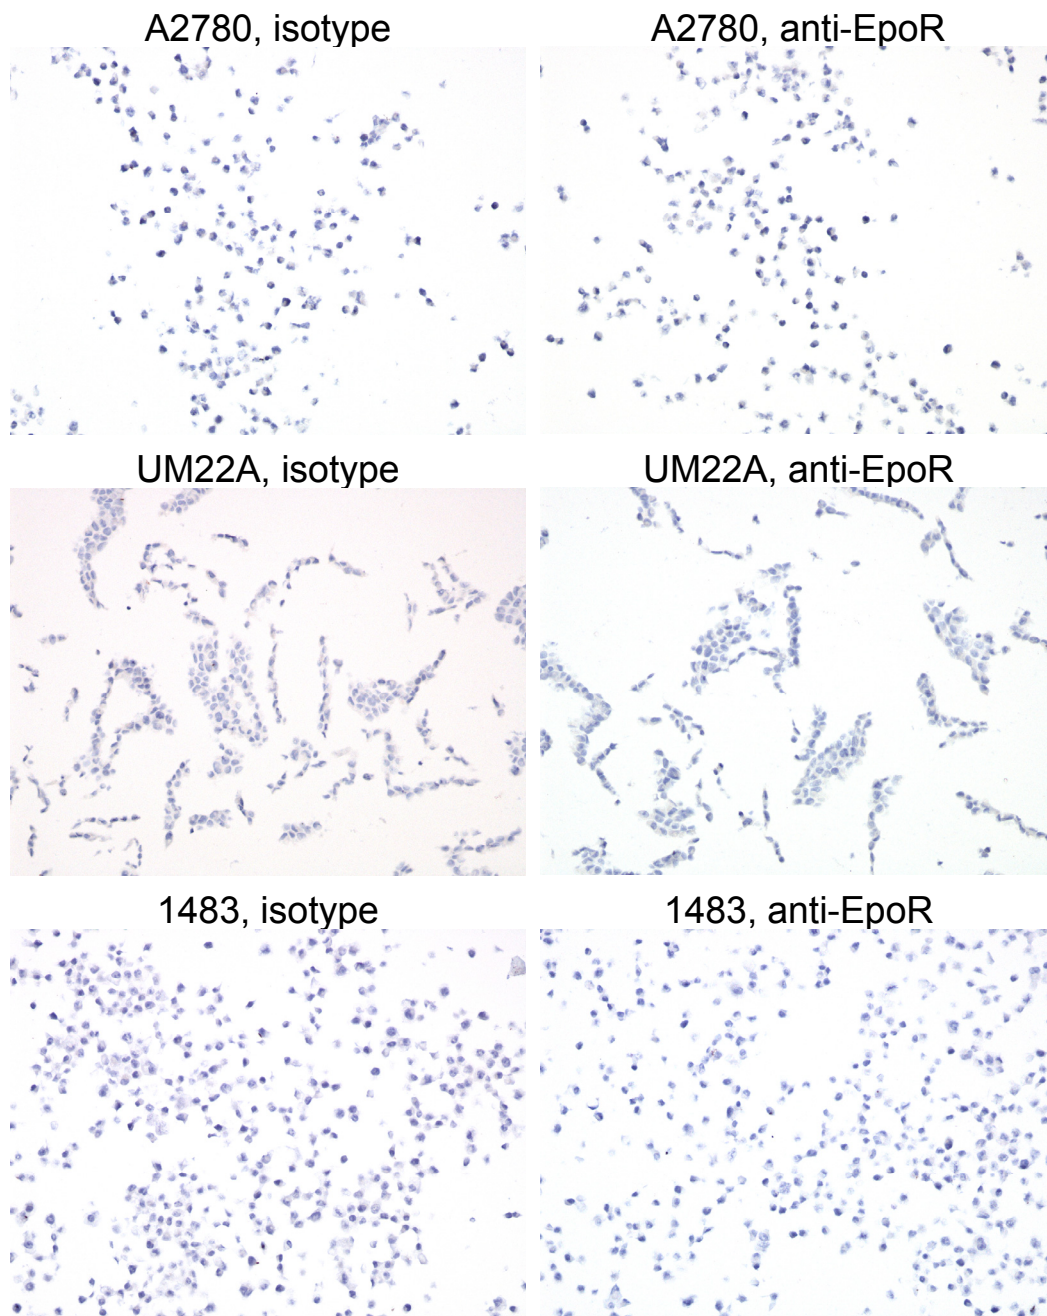

**Supplemental Fig. 2. Limited utility of EpoR protein detection in cancer cells by immunohistochemistry.** EpoR staining (brown) in 3 cancer cell lines is indistinguishable from isotype control staining. Blue represents hematoxylin counterstain. Positive controls include transfected Ba/F3-hEpoR and COS-hEpoR cells plus erythroid ASE2 cells expressing native EpoR (see next 2 pages). Negative controls include parental Ba/F3 and COS cells as well as 769P cells which have been used previously as a negative control (14).

Ba/F3, isotype

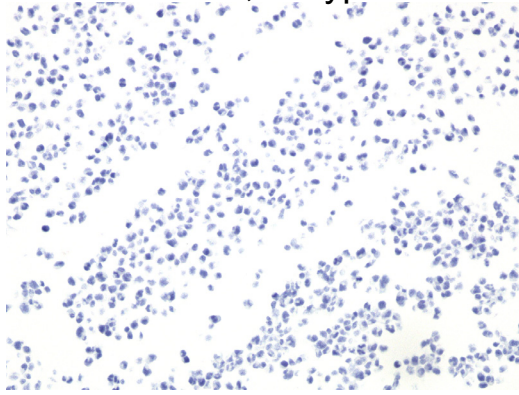

Ba/F3, anti-EpoR

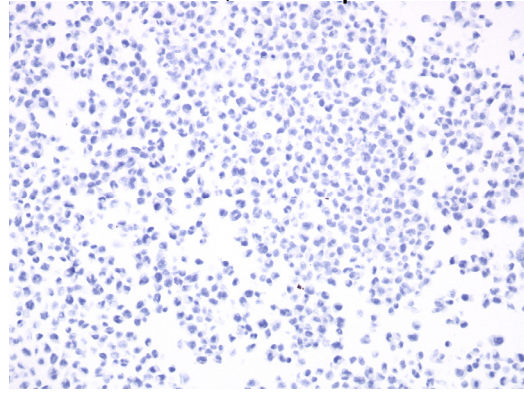

Ba/F3-hEpoR, isotype

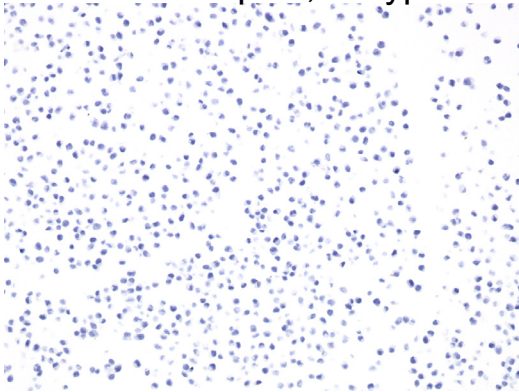

Ba/F3-hEpoR, anti-EpoR

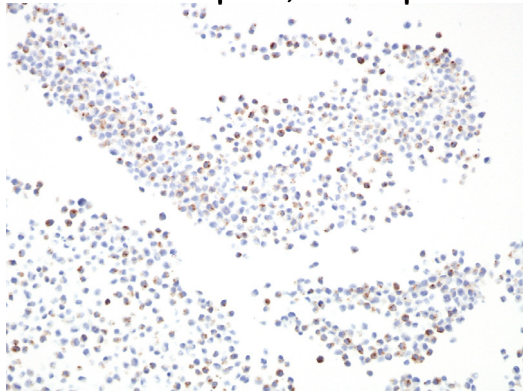

COS, isotype

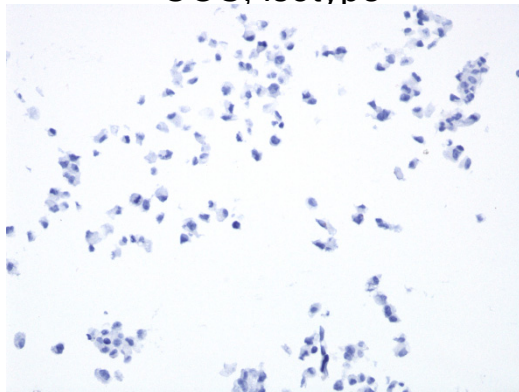

COS, anti-EpoR

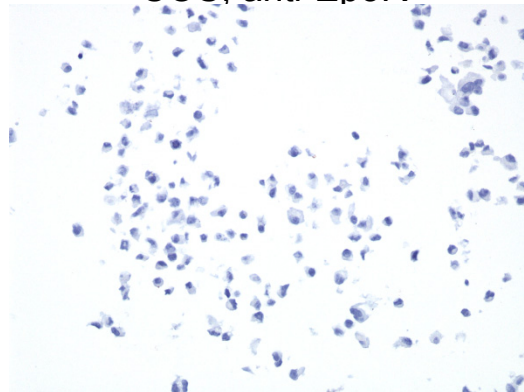

COS-hEpoR, isotype

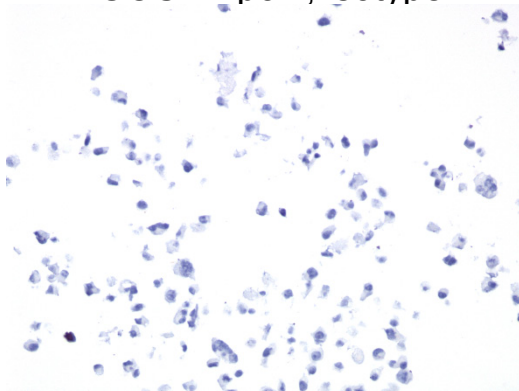

COS-hEpoR, anti-EpoR

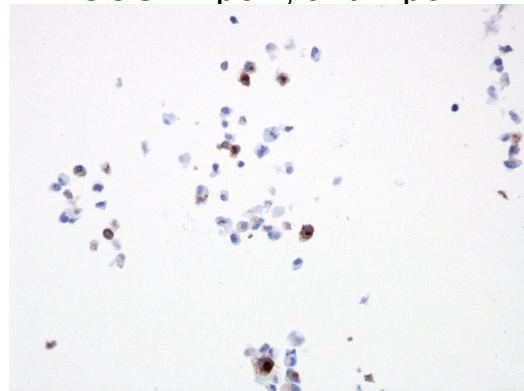

769P, isotype

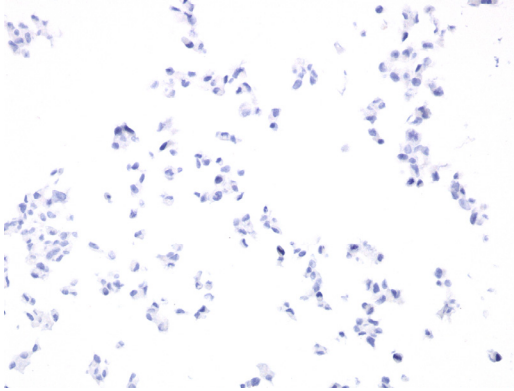

769P, anti-EpoR

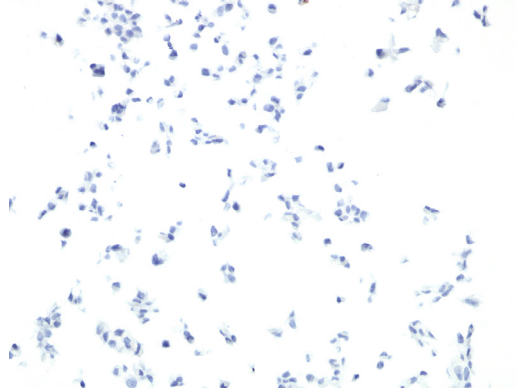

ASE2, isotype

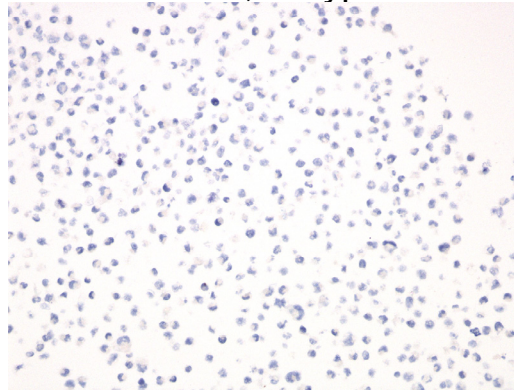

ASE2, anti-EpoR

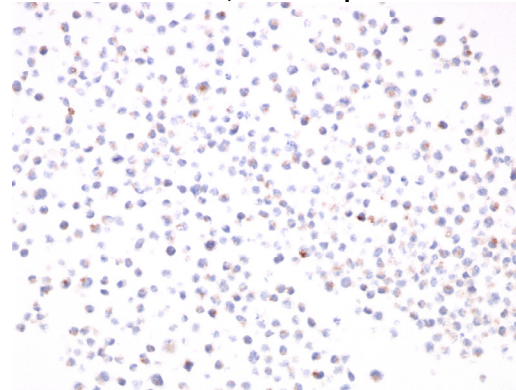

Supplemental Fig. 2, continued.
