# Supplementary material
Source: PubMed Central journal article supplement (PMC2911228)
Supplement: NIHMS219964-supplement-supplemental_Data_3.pdf [file NIHMS219964-supplement-supplemental_Data_3.pdf]

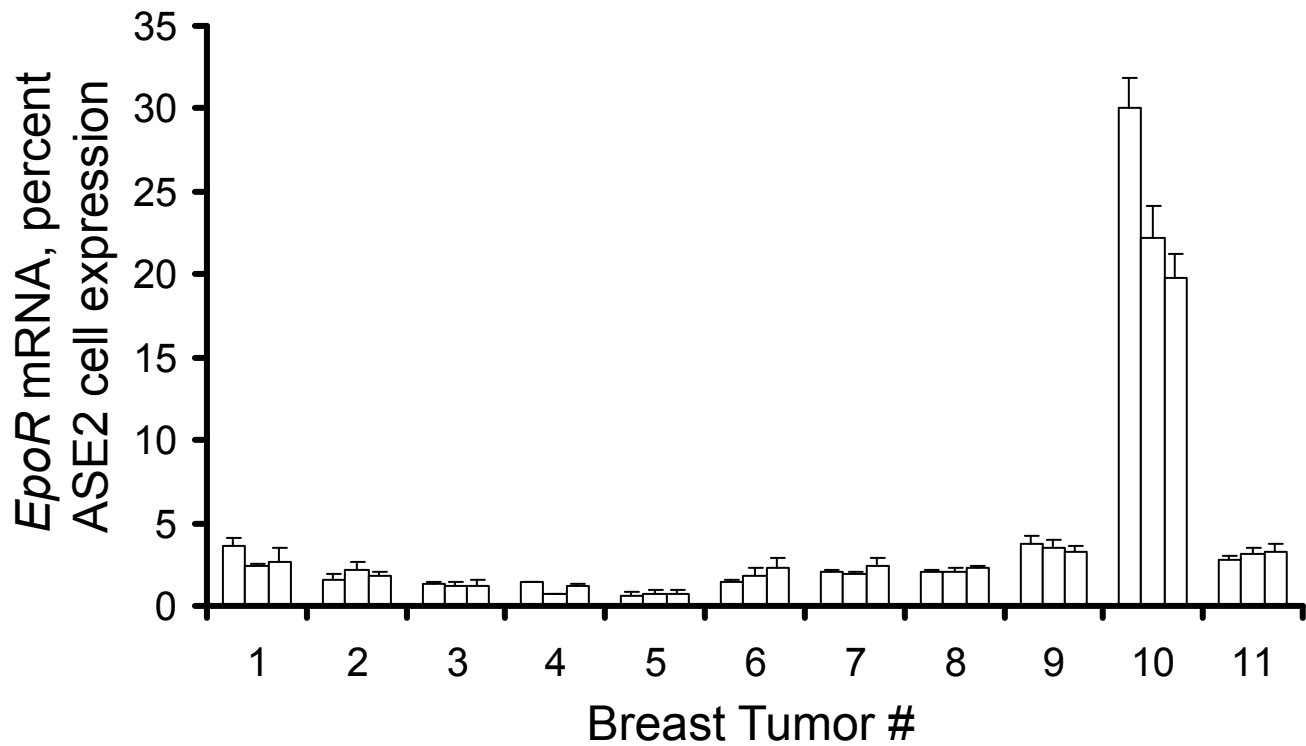

**Supplemental Fig. 3. Range of *EpoR* mRNA levels in FFPE breast tumors.** *EpoR* levels (normalized to the reference gene *Rplp0*) are expressed as a percentage of the level in erythroid ASE2 cells. Similar results are obtained upon normalization to *Actb* or *Gusb*. Each bar on the graph represents an independent RNA extraction, and error bars represent the standard deviation of triplicate PCR determinations.
