# Supplementary material
Source: PubMed Central journal article supplement (PMC2911228)
Supplement: NIHMS219964-supplement-supplemental_Data_5.pdf [file NIHMS219964-supplement-supplemental_Data_5.pdf]

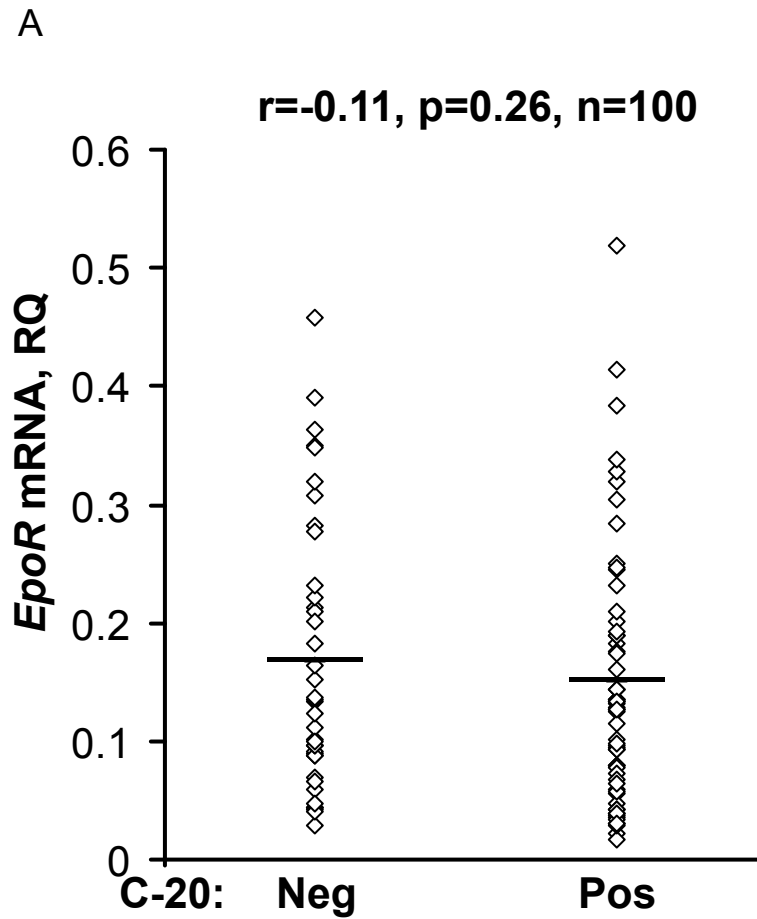

**Supplemental Fig. 5. Relationship between C20 staining results and mRNA levels for *EpoR* and *Hsp70*.** The results of previously described tumor characterization with the C20 rabbit polyclonal anti-EpoR antibody (13) are shown in comparison to mRNA levels of A, *EpoR* and B, *Hsp70* family members (see next page). Spearman's correlation coefficients ( $r$ ) are indexed.
