# Supplementary material
Source: PubMed Central journal article supplement (PMC2911228)
Supplement: NIHMS219964-supplement-supplemental_Data_7.pdf [file NIHMS219964-supplement-supplemental_Data_7.pdf]

**Supplemental Table 1. Taqman assays.**

| <b>Gene Symbol</b> | <b>Gene Name (Alternate Name/s)</b>                                                      | <b>Taqman Assay ID (ABI)*</b> | <b>Size (bp)</b> |
|--------------------|------------------------------------------------------------------------------------------|-------------------------------|------------------|
| <b>Controls</b>    |                                                                                          |                               |                  |
| <i>Tbp</i>         | TATA box binding protein                                                                 | Hs99999910_m1                 | 127              |
| <i>Ubc</i>         | ubiquitin C                                                                              | Hs00824723_m1                 | 71               |
| <i>Actb</i>        | actin, beta                                                                              | Hs99999903_m1                 | 171              |
| <i>Gusb</i>        | glucuronidase, beta                                                                      | Hs99999908_m1                 | 81               |
| <i>Polr2a</i>      | polymerase RNA II DNA directed polypeptide A                                             | Hs00172187_m1                 | 61               |
| <i>18s</i>         | eukaryotic 18S rRNA                                                                      | Hs99999901_s1                 | 187              |
| <i>Gapdh</i>       | glyceraldehyde-3-phosphate dehydrogenase                                                 | Hs99999905_m1                 | 122              |
| <i>Rplp0</i>       | ribosomal protein, large, P0                                                             | Hs99999902_m1                 | 105              |
| <i>Ipo8</i>        | importin 8                                                                               | Hs00183533_m1                 | 71               |
| <i>Tfrc</i>        | transferrin receptor (p90, CD71)                                                         | Hs99999911_m1                 | 105              |
| <i>Tfrc</i>        | transferrin receptor (p90, CD71)                                                         | Hs00951083_m1                 | 66               |
| <i>Hmbs</i>        | hydroxymethylbilane synthase                                                             | Hs00609297_m1                 | 64               |
| <i>B2m</i>         | beta-2-microglobulin                                                                     | Hs99999907_m1                 | 75               |
| <i>Ywhaz</i>       | tyrosine 3-monooxygenase/tryptophan 5-monooxygenase activation protein, zeta polypeptide | Hs00237047_m1                 | 70               |
| <i>Hprt1</i>       | hypoxanthine phosphoribosyltransferase 1                                                 | Hs99999909_m1                 | 100              |
| <i>Ppia</i>        | peptidylprolyl isomerase A (cyclophilin A)                                               | Hs99999904_m1                 | 98               |
| <i>Pgk1</i>        | phosphoglycerate kinase 1                                                                | Hs99999906_m1                 | 75               |
| <i>mPgk1†</i>      | phosphoglycerate kinase 1                                                                | Mm00435617_m1                 | 137              |
| <b>Targets</b>     |                                                                                          |                               |                  |
| <i>EpoR ‡</i>      | erythropoietin receptor                                                                  | Hs00181092_m1                 | 93               |
| <i>Epo</i>         | erythropoietin                                                                           | Hs00171267_m1                 | 134              |
| <i>Jak2</i>        | janus kinase 2                                                                           | Hs00234567_m1                 | 101              |
| <i>Esr1</i>        | estrogen receptor 1                                                                      | Hs00174860_m1                 | 62               |
| <i>Csf2rb</i>      | colony stimulating factor 2 receptor, beta (CD131, βcR)                                  | Hs00166144_m1                 | 73               |
| <i>Cdh5</i>        | cadherin 5, type 2 (VE-cadherin)                                                         | Hs00174344_m1                 | 66               |
| <i>Pecam1</i>      | platelet/endothelial cell adhesion molecule (CD31)                                       | Hs00169777_m1                 | 65               |
| <i>Cd44</i>        | CD44 molecule                                                                            | Hs00174139_m1                 | 73               |
| <i>Vegfa</i>       | vascular endothelial growth factor A                                                     | Hs00900054_m1                 | 60               |
| <i>Krt5</i>        | keratin 5                                                                                | Hs00361185_m1                 | 133              |
| <i>Hspa1a,1b</i>   | heat shock 70kDa protein 1A & 1B                                                         | Hs00359147_s1                 | 88               |
| <i>Hspa2</i>       | heat shock 70kDa protein 2                                                               | Hs00356607_g1                 | 74               |
| <i>Hspa5</i>       | heat shock 70kDa protein 5 (grp 78)                                                      | Hs99999174_m1                 | 101              |
| <i>Hspa6</i>       | heat shock 70kDa protein 6 (HSP70.B')                                                    | Hs01671925_s1                 | 80               |
| <i>Hspa8</i>       | heat shock 70kDa protein 8 (Hsc70)                                                       | Hs00941878_g1                 | 78               |
| <i>Hspa9</i>       | heat shock 70kDa protein 9 (mortalin)                                                    | Hs00269818_m1                 | 92               |
| <i>Hspa1L</i>      | heat shock 70kDa protein 1-like (HSP70.1t)                                               | Hs00987296_m1                 | 87               |

\* assay IDs denoted with \_m1 are designed to bind to exon junctions

† m denotes murine assay

‡ recognizes an *EpoR* exon 6/7 junction
