# Supplementary material
Source: PubMed Central journal article supplement (PMC2911228)
Supplement: NIHMS219964-supplement-supplemental_Data_8.pdf [file NIHMS219964-supplement-supplemental_Data_8.pdf]

**Supplemental Table 2: Control genes ranked in order of increasing stability from top to bottom according to the Genorm algorithm of Vandesompele et al (27).**

| <b>Primary Breast Cancers (n=8)</b> |                       | <b>Primar Head and Neck Cancers (n=8)</b> |                       | <b>Diverse Cancer Cell Lines (n=32)</b> |                       |
|-------------------------------------|-----------------------|-------------------------------------------|-----------------------|-----------------------------------------|-----------------------|
| Control Gene                        | Expression Stability* | Control Gene                              | Expression Stability* | Control Gene                            | Expression Stability* |
| <i>Tbp</i>                          | 0.732                 | <i>Tbp</i>                                | 1.140                 | <i>B2m</i>                              | 1.186                 |
| <i>Ubc</i>                          | 0.708                 | <i>Actb</i>                               | 1.025                 | <i>Polr2a</i>                           | 1.076                 |
| <i>Pgk1</i>                         | 0.680                 | <i>18s</i>                                | 0.946                 | <i>Tfrc</i>                             | 0.953                 |
| <i>Actb</i>                         | 0.658                 | <i>Hprt1</i>                              | 0.860                 | <i>Ipo8</i>                             | 0.796                 |
| <i>Gusb</i>                         | 0.636                 | <i>Ywhaz</i>                              | 0.792                 | <i>Hprt1</i>                            | 0.618                 |
| <i>Polr2a</i>                       | 0.619                 | <i>Ubc</i>                                | 0.754                 | <i>Hmbs</i>                             | 0.574                 |
| <i>18s</i>                          | 0.596                 | <i>B2m</i>                                | 0.712                 | <i>Rplp0 †</i>                          |                       |
| <i>Gapdh</i>                        | 0.578                 | <i>Polr2a</i>                             | 0.654                 |                                         |                       |
| <i>Rplp0</i>                        | 0.560                 | <i>Gusb</i>                               | 0.637                 |                                         |                       |
| <i>Ipo8</i>                         | 0.542                 | <i>Tfrc</i>                               | 0.598                 |                                         |                       |
| <i>Tfrc</i>                         | 0.522                 | <i>Ipo8</i>                               | 0.549                 |                                         |                       |
| <i>Hmbs</i>                         | 0.500                 | <i>Pgk1</i>                               | 0.515                 |                                         |                       |
| <i>B2m</i>                          | 0.482                 | <i>Gapdh</i>                              | 0.482                 |                                         |                       |
| <i>Ywhaz</i>                        | 0.447                 | <i>Rplp0</i>                              | 0.428                 |                                         |                       |
| <i>Hprt1</i>                        | 0.414                 | <i>Hmbs</i>                               | 0.266                 |                                         |                       |
| <i>Ppia †</i>                       |                       | <i>Ppia</i>                               |                       |                                         |                       |

\* More stable genes have a lower value in this column.

† Genorm performs pairwise comparison and in the final step lists the two most stable genes of all the candidates tested.
