# Supplementary material
Source: PubMed Central journal article supplement (PMC2911228)
Supplement: NIHMS219964-supplement-supplemental_Data_9.pdf [file NIHMS219964-supplement-supplemental_Data_9.pdf]

**Supplemental Table 3. Preamplification uniformly decreases cycle threshold values without biasing relative quantification values.\***

**Mean Cycle Threshold†**

| Transcript      | NO PREAMP‡ | PREAMP‡ |
|-----------------|------------|---------|
| <i>Hsp70_1</i>  | 21.078     | 9.017   |
| <i>Hsp70_2</i>  | 25.424     | 12.998  |
| <i>Hsp70_5</i>  | 20.362     | 7.936   |
| <i>Hsp70_6</i>  | 28.883     | 16.268  |
| <i>Hsp70_8</i>  | 20.676     | 7.974   |
| <i>Hsp70_1L</i> | 29.685     | 17.145  |
| <i>Hsp70_9</i>  | 21.831     | 9.023   |
| <i>EpoR</i>     | 25.065     | 12.676  |
| <i>Hmbs</i>     | 25.194     | 12.721  |

**Relative Quantification§**

| Transcript      | NO PREAMP‡ | PREAMP‡ | FOLD  |
|-----------------|------------|---------|-------|
| <i>Hsp70_1</i>  | 17.334     | 13.038  | 1.330 |
| <i>Hsp70_2</i>  | 0.853      | 0.826   | 1.033 |
| <i>Hsp70_5</i>  | 28.482     | 27.577  | 1.033 |
| <i>Hsp70_6</i>  | 0.078      | 0.086   | 1.104 |
| <i>Hsp70_8</i>  | 22.913     | 26.861  | 1.172 |
| <i>Hsp70_1L</i> | 0.044      | 0.047   | 1.048 |
| <i>Hsp70_9</i>  | 10.288     | 12.977  | 1.261 |
| <i>EpoR</i>     | 1.094      | 1.032   | 1.060 |

\* Preamplification was performed using the Taqman preamplification multiplex system (ABI). A variation in relative quantification  $\leq 2.82$  fold represents acceptable uniformity. The observed variation is less than 1.34 fold for all transcripts.

† Values are the mean of triplicate PCR determinations. The coefficient of variance of triplicate determinations is  $<4\%$  for all samples.

‡ Values were obtained using cDNA derived from a universal human RNA standard (Stratagene) that was either unamplified (NO PREAMP) or preamplified for 14 cycles (PREAMP).

§ Values are normalized to the reference gene *Hmbs*.
