# Supplementary material
Source: PubMed Central journal article supplement (PMC2911228)
Supplement: NIHMS219964-supplement-supplemental_Data_10.pdf [file NIHMS219964-supplement-supplemental_Data_10.pdf]

**Supplemental Table 4. Analysis of exogenous Epo administration and LPFS by *Hsp70* family member mRNA.\***

| Marker/<br>Resection<br>Stratum | Below Median†<br>Marker Value |           |                             | Above Median†<br>Marker Value |         |                             |
|---------------------------------|-------------------------------|-----------|-----------------------------|-------------------------------|---------|-----------------------------|
|                                 | Number of<br>Patients         |           | Log<br>Rank<br>P Value<br>‡ | Number of<br>Patients         |         | Log<br>Rank<br>P Value<br>‡ |
|                                 | Epo                           | Placebo   |                             | Epo                           | Placebo |                             |
| <b><i>Hsp70_1a+1b</i></b>       |                               |           |                             |                               |         |                             |
| All Patients                    | 31                            | 31        | 0.69                        | 29                            | 32      | 0.68                        |
| Complete                        | 15                            | 15        | 0.84                        | 15                            | 14      | 0.45                        |
| Incomplete                      | 7                             | 6         | 0.68                        | 4                             | 8       | 0.48                        |
| No Resection                    | 10                            | 10        | <b>0.02</b>                 | 9                             | 10      | 0.23                        |
| <b><i>Hsp70_2</i></b>           |                               |           |                             |                               |         |                             |
| All Patients                    | 28                            | 33        | 0.98                        | 32                            | 29      | 0.39                        |
| Complete                        | 17                            | 13        | 0.38                        | 13                            | 16      | 0.92                        |
| Incomplete                      | 5                             | 8         | 0.31                        | 6                             | 6       | 0.94                        |
| No Resection                    | 7                             | <b>12</b> | <b>0.05</b>                 | 12                            | 7       | 0.46                        |
| <b><i>Hsp70_5</i></b>           |                               |           |                             |                               |         |                             |
| All Patients                    | 31                            | 29        | 0.85                        | 27                            | 33      | 0.34                        |
| Complete                        | 14                            | 14        | 0.81                        | 14                            | 14      | 0.35                        |
| Incomplete                      | 7                             | 6         | 0.98                        | 4                             | 8       | 0.25                        |
| No Resection                    | 9                             | 11        | <b>0.006</b>                | 10                            | 9       | 0.82                        |
| <b><i>Hsp70_6</i></b>           |                               |           |                             |                               |         |                             |
| All Patients                    | 27                            | 35        | 0.27                        | 33                            | 28      | 0.80                        |
| Complete                        | 12                            | 18        | 0.84                        | 18                            | 11      | 0.52                        |
| Incomplete                      | 5                             | 8         | 0.62                        | 6                             | 6       | 0.20                        |
| No Resection                    | 10                            | 10        | <b>0.05</b>                 | 9                             | 10      | 0.20                        |
| <b><i>Hsp70_8</i></b>           |                               |           |                             |                               |         |                             |
| All Patients                    | 31                            | 31        | 0.88                        | 29                            | 32      | 0.51                        |
| Complete                        | 15                            | 15        | 0.34                        | 15                            | 14      | 0.81                        |
| Incomplete                      | 7                             | 6         | 0.89                        | 4                             | 8       | 0.09                        |
| No Resection                    | 9                             | 11        | <b>0.005</b>                | 10                            | 9       | 0.60                        |
| <b><i>Hsp70_9</i></b>           |                               |           |                             |                               |         |                             |
| All Patients                    | 30                            | 29        | 0.61                        | 27                            | 32      | 0.18                        |
| Complete                        | 15                            | 13        | 0.09                        | 13                            | 15      | 0.58                        |
| Incomplete                      | 6                             | 7         | 0.65                        | 5                             | 7       | 0.56                        |
| No Resection                    | 9                             | 10        | <b>0.005</b>                | 9                             | 9       | 0.29                        |
| <b><i>Hsp70_1L</i></b>          |                               |           |                             |                               |         |                             |
| All Patients                    | 16                            | 14        | 0.63                        | 13                            | 17      | 0.84                        |
| Complete                        | 11                            | 5         | 0.56                        | 6                             | 9       | 0.68                        |
| Incomplete                      | 3                             | 4         | <b>0.01</b>                 | 2                             | 5       | 0.21                        |
| No Resection                    | 4                             | 4         | 0.10                        | 3                             | 4       | 0.40                        |

\* Stratification was above versus below/equal to the median.

† The median was calculated separately for all patients and within each resection stratum.

‡ The p value is based on the log rank test to compare differences in Kaplan Meier distributions in response to Epo versus placebo. **Groups with significant adverse effects of Epo are in bold.** The p value is two-sided.
