# Supplementary material
Source: PubMed Central journal article supplement (PMC2911228)
Supplement: NIHMS219964-supplement-supplemental_Data_11.pdf [file NIHMS219964-supplement-supplemental_Data_11.pdf]

**Supplemental Table 5. Analysis of endogenous baseline Epo and LPFS in placebo treated patients by mRNA marker status.\***

| mRNA Marker/<br>Resection<br>Stratum | Below Median† Marker<br>Value or Negative |                      |                             | Above Median† Marker<br>Value or Positive |                      |                             |
|--------------------------------------|-------------------------------------------|----------------------|-----------------------------|-------------------------------------------|----------------------|-----------------------------|
|                                      | Number of<br>Patients                     |                      | Log<br>Rank<br>P Value<br>‡ | Number of<br>Patients                     |                      | Log<br>Rank<br>P Value<br>‡ |
|                                      | Low<br>Serum<br>Epo                       | High<br>Serum<br>Epo |                             | Low<br>Serum<br>Epo                       | High<br>Serum<br>Epo |                             |
| <b><i>EpoR</i> mRNA</b>              |                                           |                      |                             |                                           |                      |                             |
| All Patients                         | 15                                        | 11                   | 0.68                        | 19                                        | 7                    | 0.58                        |
| Residual Tumor                       | 8                                         | 6                    | 0.79                        | 10                                        | 3                    | 0.66                        |
| <b><i>Hsp70</i> mRNA§</b>            |                                           |                      |                             |                                           |                      |                             |
| All Patients                         | 20                                        | 10                   | 0.53                        | 20                                        | 9                    | 0.23                        |
| Residual Tumor                       | 12                                        | 3                    | 0.54                        | 9                                         | 6                    | 0.79                        |
| <b><i>Jak2</i> mRNA</b>              |                                           |                      |                             |                                           |                      |                             |
| All Patients                         | 16                                        | 12                   | 0.69                        | 21                                        | 7                    | 0.66                        |
| Residual Tumor                       | 11                                        | 4                    | 0.62                        | 9                                         | 5                    | 0.84                        |

\* Stratification was above versus below/equal to the median for the mRNA markers.

† The median was calculated separately for all patients and within each resection stratum.

‡ The p value is based on the log rank test to compare differences in Kaplan Meier distributions in patients with high versus low baseline serum Epo levels. The p value is two-sided.

§ *Hsp70* mRNA represents the cumulative expression of all 8 family members.
