# Supplementary material
Source: PubMed Central journal article supplement (PMC2911228)

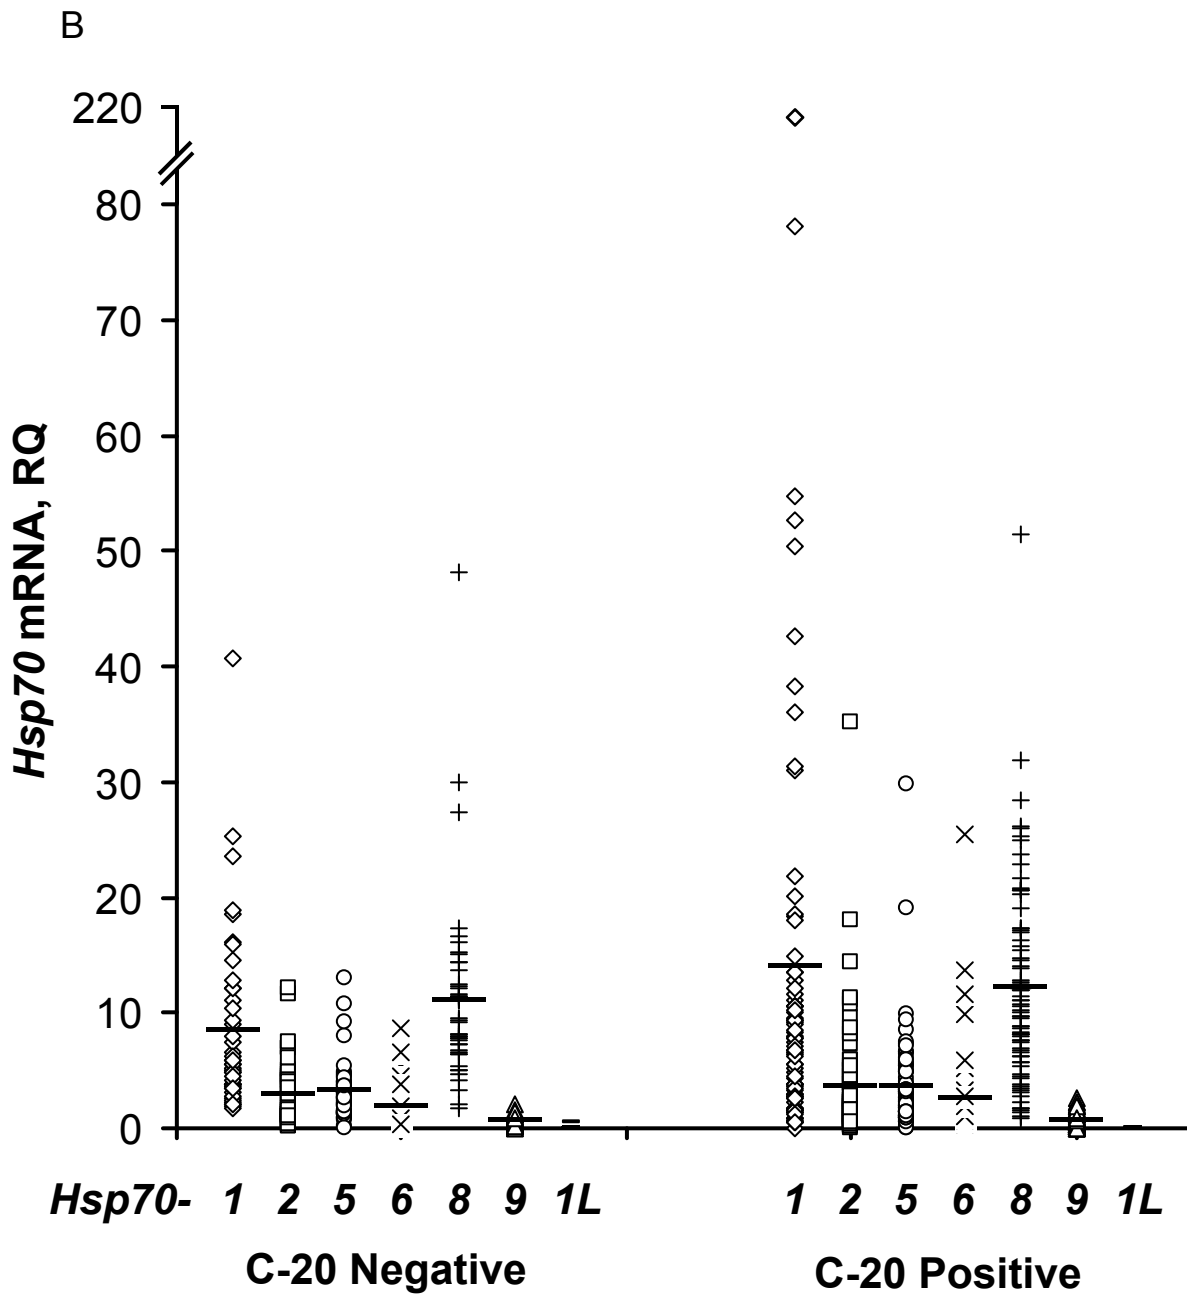

| <b>Hsp70-</b> | <b>r =</b>   | <b>p =</b>  | <b>n =</b> |
|---------------|--------------|-------------|------------|
| <b>1</b>      | <b>0.02</b>  | <b>0.84</b> | <b>122</b> |
| <b>2</b>      | <b>0.02</b>  | <b>0.87</b> | <b>122</b> |
| <b>5</b>      | <b>0.001</b> | <b>0.99</b> | <b>120</b> |
| <b>6</b>      | <b>0.03</b>  | <b>0.78</b> | <b>123</b> |
| <b>8</b>      | <b>0.05</b>  | <b>0.60</b> | <b>123</b> |
| <b>9</b>      | <b>-0.01</b> | <b>0.88</b> | <b>118</b> |
| <b>1L</b>     | <b>0.09</b>  | <b>0.48</b> | <b>123</b> |

Supplement: NIHMS219964-supplement-supplemental_Data_6.pdf [file NIHMS219964-supplement-supplemental_Data_6.pdf]
